# Supplementary material for: Cactus-like iron oxide/carbon porous microspheres lodged in nitrogen-doped carbon nanotubes as anodic electrode materials of lithium ion batteries
Source: Royal Society of Chemistry journal article supplement (doi:10.1039/d2nj05404c), 2022-11-25
Supplement: d2nj05404c1.pdf [file d2nj05404c1.pdf]

## Supporting Information

### **Cactus-like Iron Oxide/Carbon Porous Microspheres Lodged in Nitrogen-Doped Carbon Nanotubes as Anodic Electrode Materials of Lithium Ion Batteries**

Ming Chen,<sup>\*a</sup> Feng-Ming Liu,<sup>a</sup> Shan-Shuai Chen,<sup>b</sup> Rong Wan<sup>a</sup>, Xing Qian<sup>c</sup> and Zhong-Yong Yuan<sup>d</sup>

<sup>a</sup> College of Chemistry and Chemical Engineering, Xinyang Normal University, Xinyang 464000, China \*E-mail: chenming19830618@126.com

<sup>b</sup> Sanya Nanfan Research Institute of Hainan University, Hainan University, Sanya, 572025, China.

<sup>c</sup> College of Chemical Engineering, Fuzhou University, Fuzhou 350116, China.

<sup>d</sup> School of Materials Science and Engineering, Nankai University, Tianjin 300071, China

### **Experimental Section**

#### **Preparation of Samples.**

**The synthesis of C<sub>3</sub>N<sub>4</sub>:** 10 g melamine was pressed into a pellet under a pressure of 20 MPa. The pellet was calcined at 600 °C for 1 h in N<sub>2</sub> atmosphere. Then the obtained yellow powder was collected as the carbon and nitrogen precursor for the preparation of Fe<sub>3</sub>C@NCNT.

**The synthesis of Fe<sub>3</sub>C@NCNT:** 1.5 g FeCl<sub>3</sub>·6H<sub>2</sub>O were dissolved in 5 ml deionized water, and a reddish brown solution was obtained after stirring for 15 min.

Then 5 g  $C_3N_4$  powder was added to the above solution under tempestuously stirring to form a brown slurry. Then, the colloidal compounds were milled continually to form a paste, following the evaporation of water. The obtained paste was dried at 80 °C for 24 h and manually ground into powder. The powder was transferred to a semiclosed quartz boat and heated at 350 °C for 1 h at a heating rate of 2 °C  $min^{-1}$  in a tubular furnace under  $N_2$  flow, and the temperature was increased to 700 °C at 2 °C  $min^{-1}$  and kept at 700 °C for 3 h, followed by cooling to room temperature naturally. The prepared black powder was treated in 4 M HCl aqueous solution at 80 °C for 12 h, followed by washing in distilled water and dried at 150 °C for 1 h in vacuum. The obtained composite was labeled as  $Fe_3C@NCNT$ .

**The synthesis of cactus-like  $Fe_2O_3/C@NCNT$  porous microspheres:** The obtained  $Fe_3C@NCNT$  powder was calcined in a muffle furnace in air at 450 °C for 0.5 h with a heating rate of 10 °C  $min^{-1}$ , and the resultant product was denoted as  $Fe_2O_3/C@NCNT$ .

**The synthesis of cactus-like  $Fe_2O_3$  porous microspheres:** The cactus-like  $Fe_2O_3$  was obtained by annealing the  $Fe_3C@NCNT$  at 600 °C for 1 h in air.

**The synthesis of  $Fe_2O_3/CB$ :** 3 g  $FeC_2O_4 \cdot 2H_2O$  and 0.7 g carbon black was dispersed in 3 ml deionized water and ground by mortar and pestle to form a slurry. Then the slurry was dried at 80 °C in oven overnight. The obtained powder was transferred to a quartz boat and covered by a quartz cap. Then heat treated at 450 °C for 1 h in air to form  $Fe_2O_3/CB$ .

## Material Characterization

The crystalline structure of the products was characterized by X-ray diffraction (XRD) on a Rigaku SmartLab9 powder diffractometer equipped with  $Cu K_\alpha$  radiation ( $\lambda = 1.541 \text{ \AA}$ ). Thermogravimetric analysis (TGA) was performed on a TA SDT Q600 analyser in air with a heating rate of 10 °C  $min^{-1}$ . The morphology of the products was observed by field emission scanning electron microscopy (FE-SEM) on a ZEISS SUPRA 55 microscope and transmission electron microscopy (TEM) on a Tecnai G2

F20 microscope. Raman spectra were collected on a Renishaw-1000 spectrometer by exciting a 514.5 nm Ar ion laser. The carbon content was measured by using Carbon/Sulfur determinator (ELTRA, CS800). N<sub>2</sub> adsorption-desorption isotherms were recorded at 77 K on a Quantachrome NOVA 2000e sorption analyzer. Optical absorption spectroscopy was performed in the 300-700 nm range in 1 nm steps on an ultraviolet-visible-near-infrared, double beam spectrophotometer (America PerkinElmer Lambda 950).

### **Electrochemical Characterization**

Fe<sub>2</sub>O<sub>3</sub>/C@NCNT or Fe<sub>2</sub>O<sub>3</sub>/CB and polyvinylidene fluoride (PVDF) binder in a weight ratio of 90 : 10 were mixed in N-methylpyrrolidone (NMP) and stirred for 24 h to make a slurry. The slurry was then spread on a Cu foil (13 mm in diameter, 0.3 mm in thickness) with a surface density of 1.0 mg cm<sup>-2</sup> and dried at 120 °C for 24 h to fabricate the working electrodes in vacuum. Lithium foil was used as both the reference electrode and the counter electrode (13 mm in diameter, 0.5 mm in thickness). 1.0 M LiPF<sub>6</sub> in a 1:1 (v/v) mixture of ethylene carbonate (EC) and diethyl carbonate (DEC) was employed as the electrolyte. Celgard 2300 membrane (25 μm-thick polyethylene) was adopted as a separator. The assembly of CR2032-type coin cells was conducted in a high-purity Ar filled glovebox. Galvanostatic cycling was performed between 0.01 and 3 V vs Li<sup>+</sup>/Li at various C rates on a Land Battery Tester (Wuhan, China), where 1 C corresponds to 1000 mA g<sup>-1</sup>. Cyclic voltammetry (CV) was conducted between 0.01 and 3 V at 0.1 mV s<sup>-1</sup> using a CHI660E electrochemical workstation. Electrochemical impedance spectroscopy (EIS) was performed on the same electrochemical system over the frequency range from 100 kHz to 100 mHz with a perturbation voltage of 5 mV. All of the electrochemical measurements were performed at 25 °C in an ambient atmosphere.

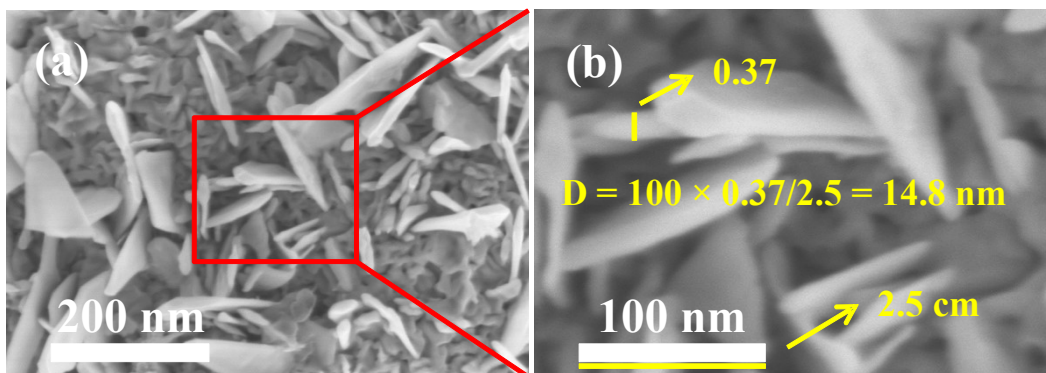

**Fig. S1** (a) SEM image of  $\text{Fe}_2\text{O}_3/\text{C}@$ NCNT nanocomposite and (b) enlarged SEM image of the selected area in (a).

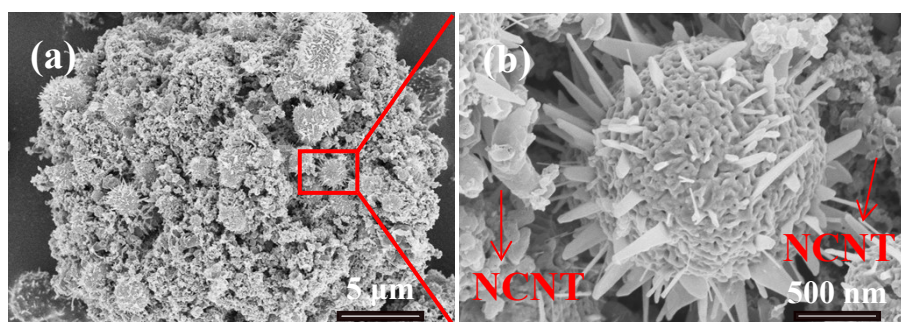

**Fig. S2** SEM images of (a)  $\text{Fe}_2\text{O}_3/\text{C}@$ NCNT and (b) embedded cactus-like  $\text{Fe}_2\text{O}_3/\text{C}$  in wrapped NCNTs of the selected area in (a).

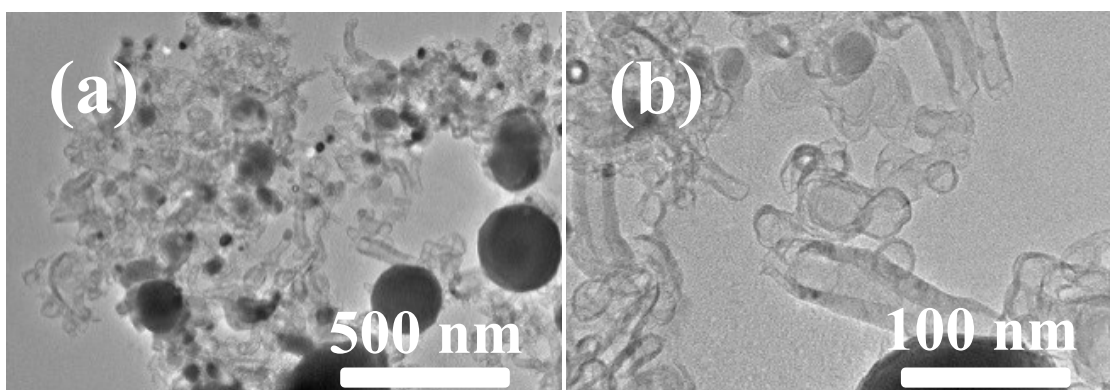

**Fig. S3** TEM images of open NCNTs with segregated  $\text{Fe}_3\text{C}$  nanoparticles.

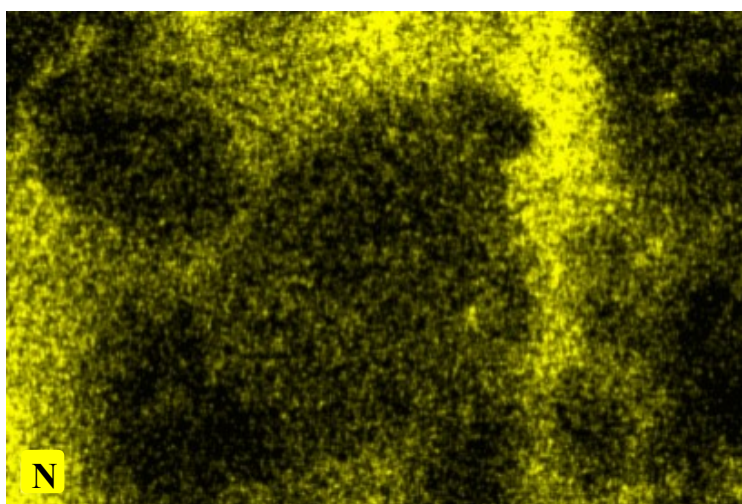

**Fig. S4** The EDS mapping for N element in cactus-like  $\text{Fe}_2\text{O}_3/\text{C}$  porous microspheres in Fig. 3f.

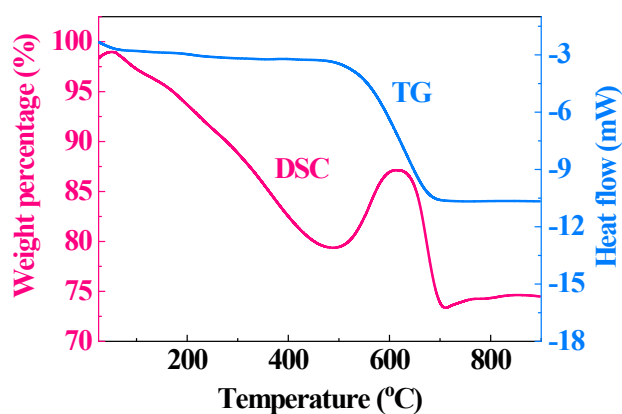

**Fig. S5** TG/DSC curves of  $\text{Fe}_2\text{O}_3/\text{C}@\text{NCNT}$  measured in air.

The detailed chemical compositions in  $\text{Fe}_2\text{O}_3/\text{C}@\text{NCNT}$  composite were further quantified by thermogravimetric curve, which was recorded under air at a heating rate of  $10\text{ }^\circ\text{C min}^{-1}$ . As presented in Fig. S3, the TG curve of  $\text{Fe}_2\text{O}_3/\text{C}@\text{NCNT}$  composite exhibited a main mass loss of 14.59 wt % in the temperature range of 450-600  $^\circ\text{C}$ , which was attributed to oxidation of carbon nanotubes and amorphous carbon. The mass percentage of residual  $\text{Fe}_2\text{O}_3$  were examined to about 85.41 wt %. Finally, the TG-DSC curve combined with result of carbon/sulfur determinator further identified that the weight percentages of  $\text{Fe}_2\text{O}_3$  and C in  $\text{Fe}_2\text{O}_3/\text{C}@\text{NCNT}$  were ca. 14.59, and 85.41 wt. %, respectively.

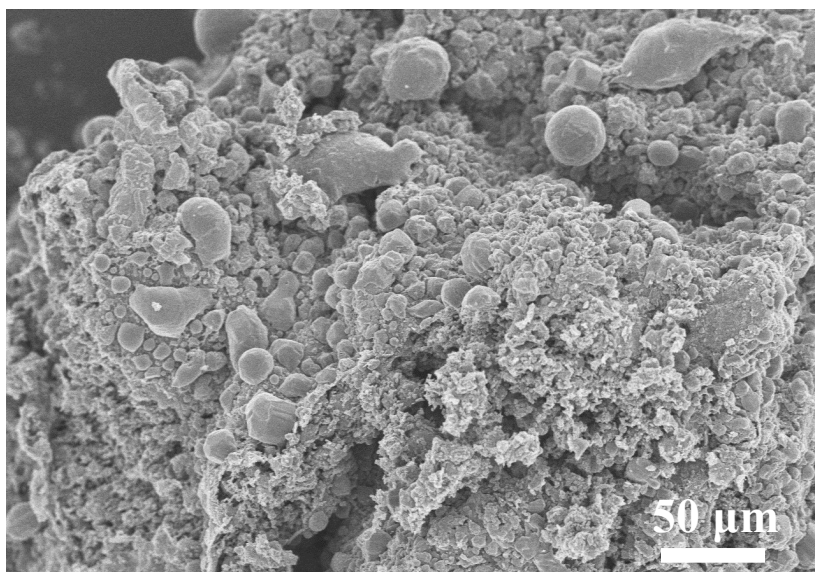

Fig. S6 The SEM image of Fe<sub>2</sub>O<sub>3</sub>/CB.

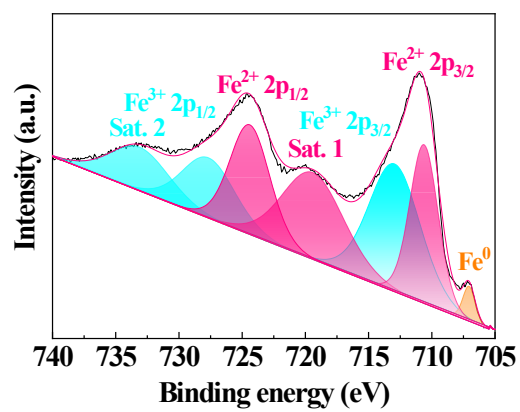

Fig. S7 High-resolution XPS spectrum of Fe 2p of Fe<sub>3</sub>C@NCNT hybrid.

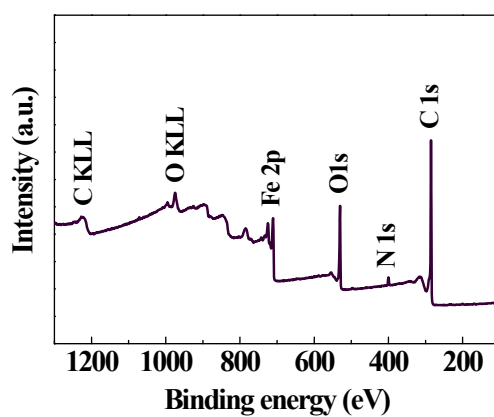

Fig. S8 XPS survey spectrum of Fe<sub>2</sub>O<sub>3</sub>/C@NCNT hybrid.

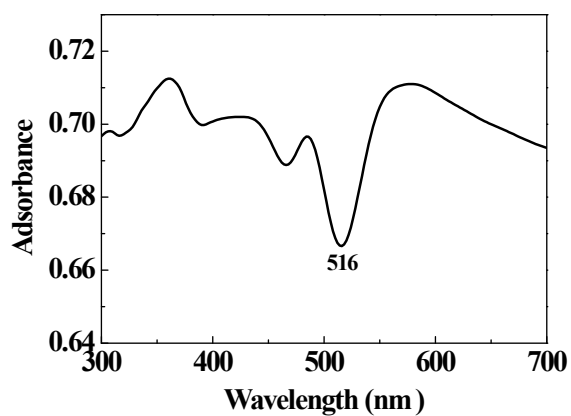

Fig. S9 Absorption spectrum of Fe<sub>2</sub>O<sub>3</sub>/C@NCNT hybrid.



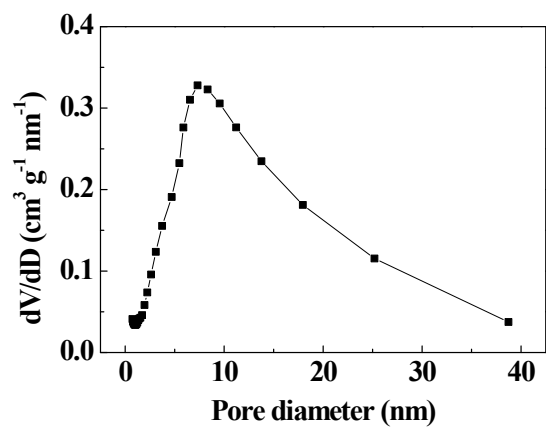

Fig. S10 The BJH pore size distribution curve of Fe<sub>2</sub>O<sub>3</sub>/C@NCNT..

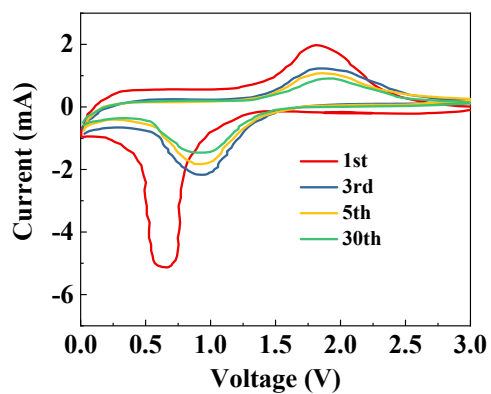

Fig. S11 CV of cactus-like Fe<sub>2</sub>O<sub>3</sub> || Li half-cells at 0.1 mV s<sup>-1</sup> for the 1st cycle.

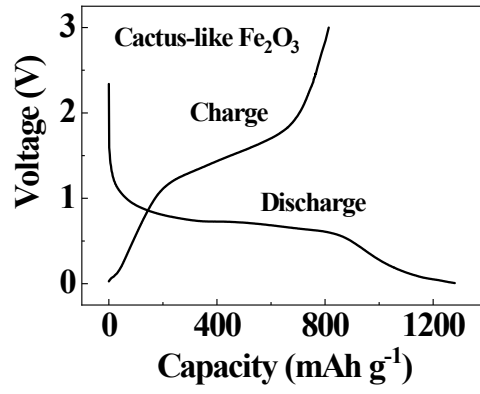

**Fig. S12** The charge and discharge curve of cactus-like  $\text{Fe}_2\text{O}_3$  based half-cell at 0.1 C (100 mA  $\text{g}^{-1}$ ).

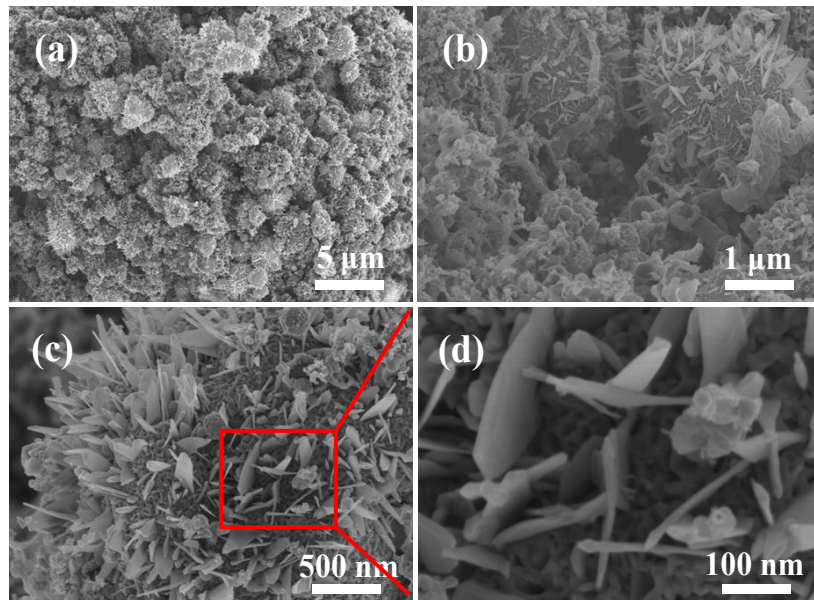

**Fig. S13** Top-view SEM images of  $\text{Fe}_2\text{O}_3/\text{C}@\text{NCNT}$  electrode after 600 cycles.

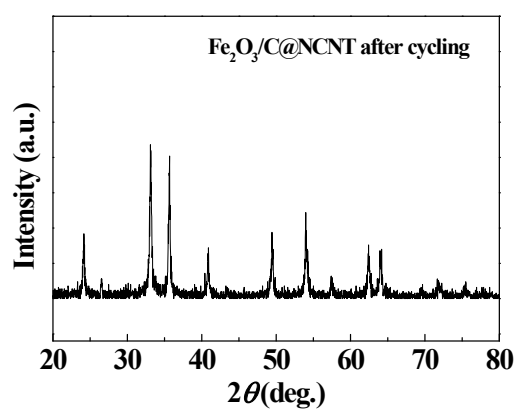

**Fig. S14** XRD pattern of Fe<sub>2</sub>O<sub>3</sub>/C@NCNT electrode after 600 cycles.
